# Supplementary material for: Illness perceptions of adults with eczematous skin diseases: a systematic mixed studies review
Source: Syst Rev. 2021 May 7;10:141. doi: 10.1186/s13643-021-01687-5 (PMC8106167; doi:10.1186/s13643-021-01687-5)
Supplement: Supplementary file 6 — Additional file 6. Quality Assessment. [file 13643_2021_1687_MOESM6_ESM.xlsx]

## Sheet: MMAT checklist
Additional file 6_Illness perceptions of adults with eczematous skin diseases
				SCREENING QUESTIONS		1. QUALITATIVE STUDIES					2. RANDOMIZED CONTROLLED TRIALS					3. NON-RANDOMIZED STUDIES					4. QUANTITATIVE DESCRIPTIVE STUDIES					5. MIXED METHODS STUDIES					COMMENTS
RefID	First author	Year	Citation	S1. Are there clear research questions?	S2. Do the collected data allow to address the research questions?	1.1. Is the qualitative approach appropriate to answer the research question?	1.2. Are the qualitative data collection methods adequate to address the research question?	1.3. Are the findings adequately derived from the data?	1.4. Is the interpretation of results sufficiently substantiated by data?	1.5. Is there coherence between qualitative data sources, collection, analysis and interpretation?	2.1. Is randomization appropriately performed?	2.2. Are the groups comparable at baseline?	2.3. Are there complete outcome data?	2.4. Are outcome assessors blinded to the intervention provided?	2.5 Did the participants adhere to the assigned intervention?	3.1. Are the participants representative of the target population?	3.2. Are measurements appropriate regarding both the outcome and intervention (or exposure)?	3.3. Are there complete outcome data?	3.4. Are the confounders accounted for in the design and analysis?	3.5. During the study period, is the intervention administered (or exposure occurred) as intended?	4.1. Is the sampling strategy relevant to address the research question?	4.2. Is the sample representative of the target population?	4.3. Are the measurements appropriate?	4.4. Is the risk of nonresponse bias low?	4.5. Is the statistical analysis appropriate to answer the research question?	5.1. Is there an adequate rationale for using a mixed methods design to address the research question?	5.2. Are the different components of the study effectively integrated to answer the research question?	5.3. Are the outputs of the integration of qualitative and quantitative components adequately interpreted?	5.4. Are divergences and inconsistencies between quantitative and qualitative results adequately addressed?	5.5. Do the different components of the study adhere to the quality criteria of each tradition of the methods involved?
46	Bathe	2012	Bathe A, Diepgen TL, Matterne U. Subjective illness perceptions in individuals with occupational skin disease: a qualitative investigation. Work. 2012;43:159–69.	Yes	Yes	Yes	Yes	Yes	Yes	Yes	x	x	x	x	x	x	x	x	x	x	x	x	x	x	x	x	x	x	x	x
51	Benyamini	2012	Benyamini Y, Goner-Shilo D, Lazarov A. Illness perception and quality of life in patients with contact dermatitis. Contact Derm. 2012;67:193–9.	Yes	Yes	x	x	x	x	x	x	x	x	x	x	x	x	x	x	x	Yes	Can't tell	Yes	Yes	Yes	x	x	x	x	x
52	Březinová	2017	Březinová E, Nečas M, Vašků V. Quality of life and psychological disturbances in adults with atopic dermatitis in the Czech Republic. J Biol Regul Homeost Agents. 2017;31:227–33.	Yes	Yes	x	x	x	x	x	x	x	x	x	x	x	x	x	x	x	Yes	Can't tell	Yes	Can't tell	Yes	x	x	x	x	x
48	Mollerup	2013	Mollerup A, Johansen JD, Thing LF. Knowledge, attitudes and behaviour in everyday life with chronic hand eczema: a qualitative study. Br J Dermatol. 2013;169:1056–65.	Yes	Yes	Yes	Yes	Yes	Yes	Yes	x	x	x	x	x	x	x	x	x	x	x	x	x	x	x	x	x	x	x	x
49	Mollerup	2014	Mollerup A, Veien NK, Johansen JD. An analysis of gender differences in patients with hand eczema - everyday exposures, severity, and consequences. Contact Derm. 2014;71:21–30.	Yes	Yes	x	x	x	x	x	x	x	x	x	x	x	x	x	x	x	Yes	Yes	Yes	Yes	Yes	x	x	x	x	x
50	Wittkowski	2007	Wittkowski A, Richards HL, Griffiths CEM, Main CJ. Illness perception in individuals with atopic dermatitis. Psychol Health Med. 2007;12:433–44.	Yes	Yes	x	x	x	x	x	x	x	x	x	x	x	x	x	x	x	Yes	Can't tell	Yes	Can't tell	Yes	x	x	x	x	x
47	Zack	2017	Zack B, Arrandale VH, Holness DL. Workers with hand dermatitis and workplace training experiences: A qualitative perspective. Am J Ind Med. 2017;60:69–76.	Yes	Yes	Yes	Yes	Yes	Yes	Yes	x	x	x	x	x	x	x	x	x	x	x	x	x	x	x	x	x	x	x	x
Comments						Disease perceptions can be measured through various research approaches, both qualitative or quantitative. Thus, qualitative approaches are appropriate to answer the research question.	The data collection methods serve to generate a deeper understanding of complex psychological or social issues and therefore present an adequate choice in this context.	The studies use accepted and established methods of data analysis, such as thematic analysis, inductive and deductive categorization as well as content analysis.	The studies support interpretations with relevant primary data (e.g. quotes).	The coherence of analyses and interpretations are underlined by detailed explanations as well as by references to underlying theoretical frameworks.											We assumed different sampling strategies to be adequate, including non-probability sampling. In addition, we supposed sampling to be appropriate if patients were recruited in clinical settings.	We checked indicators of representativeness, such as description of the target group, inclusion and exclusion criteria and reasons for non-participation.	The included studies used validated and reliable outcome measures, e.g. questionnaires like the Brief Illness Perception Questionnaire.	Nonresponse bias risk was assessed by different indicators (e. g. comparing nonresponders and responders as well as judging rate of nonresponders), sofar as they were reported by the authors of the study.	Statistical analyses are appropriate with regard to study design and research questions. Accepted an established methods for statistical analyses are used.
